# Supplementary material for: Analysis of Human Blood Plasma Proteome from Ten Healthy Volunteers from Indian Population
Source: PLoS One. 2013 Aug 20;8(8):e72584. doi: 10.1371/journal.pone.0072584 (PMC3748081; doi:10.1371/journal.pone.0072584)
Supplement: Table S3 — A comprehensive dataset of 517 unique proteins identified from all the three workflows. A total of 271 proteins were identified with≥2 unique peptides or by a single peptide identified in any of the two workflows. Another 246 proteins were identified by single peptide and any one of the workflows. The workflow(s) in which a protein was identified is shown in the table. The dataset of 271 proteins identified with high confidence in our dataset was compared with published plasma protein dataset by Schenk et al [Ref. 10], and Anderson et al [Ref 8] and 121 and 82 proteins respectively were found to be matching to our dataset. (XLS) [file pone.0072584.s005.xls]

## Sheet: Supp table S3
Table S3: A comprehensive dataset of 517 unique proteins identified from all the three workflows. A total of 271 proteins were identified with ≥2 unique peptides or by a single peptide identified in any of the two workflows. Another 246 proteins were identified by single peptide and any one of the workflows. The workflow(s) in which a protein was identified is shown in the table. The dataset of 2…
NP- No prefractionation; SCX- Strong cation exchange chromatography; SDS-PAGE- sodium dodecyl sulfate polyacrylamide gel electrophoresis
Accession	Description	Uniprot name	Comp with Schenk et al., 2008 [Ref. 10]	Comp with Anderson et al., 2004 [Ref 8]	Unique peptides	# AAs	MW [kDa]	calc. pI	NP	SCX	SDS-PAGE
≥ 2 peptides-based protein IDs in any workflow
IPI:IPI00304273.2	Apolipoprotein A-IV	Apolipoprotein A-IV	+	+	38	396	45.4	5.38	NP Mascot	SCX Sequest and Mascot	SDS-PAGE Sequest and Mascot
IPI:IPI00022895.8	Isoform 1 of Alpha-1B-glycoprotein	Isoform 1 of Alpha-1B-glycoprotein	+	-	15	495	54.2	5.86	NP Mascot	SCX Mascot	SDS-PAGE Mascot
IPI:IPI00556459.2	cDNA FLJ58564, highly similar to Plasma protease C1 inhibitor	cDNA FLJ58564, highly similar to Plasma protease C1 inhibitor	-	-	14	448	49.7	6.54	NP Mascot	SCX Mascot	SDS-PAGE Mascot
IPI:IPI00007199.4	Protein Z-dependent protease inhibitor	Protein Z-dependent protease inhibitor	+	+	7	484	55.1	7.64	NP Mascot	SCX Sequest and Mascot	SDS-PAGE Sequest
IPI:IPI00967977.2	Conserved hypothetical protein	Conserved hypothetical protein	-	-	5	294	31.7	6.29	NP Mascot	SCX Mascot	SDS-PAGE Mascot
IPI:IPI00418163.3	complement C4-B preproprotein	complement C4-B preproprotein	+	-	64	1744	192.6	7.27	NP Sequest	SCX Sequest and Mascot	SDS-PAGE Sequest and Mascot
IPI:IPI00022895.7	Alpha-1B-glycoprotein	Alpha-1B-glycoprotein	-	-	13	495	54.2	5.87	NP Sequest	SCX Sequest	SDS-PAGE Sequest
IPI:IPI00215983.3	Carbonic anhydrase 1	Carbonic anhydrase 2	+	-	6	261	28.9	7.12	NP Sequest	SCX Sequest	SDS-PAGE Sequest
IPI:IPI00945343.1	Ficolin (Collagen/fibrinogen domain containing) 3	Ficolin (Collagen/fibrinogen domain containing) 4	-	-	4	99	11.4	4.84	NP Sequest	SCX Sequest and Mascot	SDS-PAGE Sequest
IPI:IPI00022229.2	Apolipoprotein B-100	Apolipoprotein B-101	+	+	190	4563	515.3	7.05	NP Sequest and Mascot	SCX Sequest and Mascot	SDS-PAGE Sequest and Mascot
IPI:IPI00017601.1	Ceruloplasmin	Ceruloplasmin	+	+	50	1065	122.1	5.72	NP Sequest and Mascot	SCX Sequest and Mascot	SDS-PAGE Sequest and Mascot
IPI:IPI00029739.5	Isoform 1 of Complement factor H	Isoform 1 of Complement factor H	+	-	49	1231	139	6.61	NP Sequest and Mascot	SCX Sequest and Mascot	SDS-PAGE Sequest and Mascot
IPI:IPI00019580.1	Plasminogen	Plasminogen	+	+	45	810	90.5	7.24	NP Sequest and Mascot	SCX Sequest and Mascot	SDS-PAGE Sequest and Mascot
IPI:IPI00032291.2	Complement C5	Complement C6	+	+	44	1676	188.2	6.52	NP Sequest and Mascot	SCX Sequest and Mascot	SDS-PAGE Sequest and Mascot
IPI:IPI00019591.2	cDNA FLJ55673, highly similar to Complement factor B	cDNA FLJ55673, highly similar to Complement factor B	+	-	41	1266	140.9	7.18	NP Sequest and Mascot	SCX Sequest	SDS-PAGE Sequest and Mascot
IPI:IPI00555812.5	vitamin D-binding protein isoform 1 precursor	vitamin D-binding protein isoform 1 precursor	+	-	34	474	52.9	5.45	NP Sequest and Mascot	SCX Sequest and Mascot	SDS-PAGE Sequest and Mascot
IPI:IPI00019568.1	Prothrombin (Fragment)	Prothrombin (Fragment)	+	+	32	622	70	5.9	NP Sequest and Mascot	SCX Sequest	SDS-PAGE Sequest and Mascot
IPI:IPI00032179.3	Antithrombin-III	Antithrombin-III	+	+	31	464	52.6	6.71	NP Sequest and Mascot	SCX Sequest and Mascot	SDS-PAGE Sequest and Mascot
IPI:IPI00292530.1	Inter-alpha-trypsin inhibitor heavy chain H1	Inter-alpha-trypsin inhibitor heavy chain H2	+	+	29	911	101.3	6.79	NP Sequest and Mascot	SCX Sequest and Mascot	SDS-PAGE Sequest and Mascot
IPI:IPI00879709.3	Complement component 6 precursor	Complement component 6 precursor	-	-	28	943	105.7	6.79	NP Sequest and Mascot	SCX Sequest and Mascot	SDS-PAGE Sequest and Mascot
IPI:IPI00009865.4	Keratin, type I cytoskeletal 10	Keratin, type I cytoskeletal 11	+	-	24	584	58.8	5.21	NP Sequest and Mascot	SCX Sequest	SDS-PAGE Sequest and Mascot
IPI:IPI00022488.1	Hemopexin	Hemopexin	+	+	24	462	51.6	7.02	NP Sequest and Mascot	SCX Sequest and Mascot	SDS-PAGE Sequest and Mascot
IPI:IPI00298497.3	Fibrinogen beta chain	Fibrinogen beta chain	+	+	24	491	55.9	8.27	NP Sequest and Mascot	SCX Sequest	SDS-PAGE Sequest and Mascot
IPI:IPI00029717.1	Isoform 2 of Fibrinogen alpha chain	Isoform 2 of Fibrinogen alpha chain	-	-	23	644	69.7	8.06	NP Sequest and Mascot	SCX Sequest and Mascot	SDS-PAGE Sequest and Mascot
IPI:IPI00478809.4	Coagulation factor V	Coagulation factor V	-	+	23	2224	251.5	6.05	NP Sequest and Mascot	SCX Sequest and Mascot	SDS-PAGE Sequest
IPI:IPI00847635.1	Isoform 1 of Alpha-1-antichymotrypsin	Isoform 1 of Alpha-1-antichymotrypsin	-	-	23	423	47.6	5.52	NP Sequest and Mascot	SCX Sequest and Mascot	SDS-PAGE Sequest and Mascot
IPI:IPI00019943.1	Afamin	Afamin	+	-	22	599	69	5.9	NP Sequest and Mascot	SCX Sequest and Mascot	SDS-PAGE Sequest and Mascot
IPI:IPI00479723.5	Isoform 10 of Fibronectin	Isoform 10 of Fibronectin	-	-	22	2176	239.5	5.88	NP Sequest and Mascot	SCX Mascot	SDS-PAGE Mascot
IPI:IPI00879573.1	Heparin cofactor 2	Heparin cofactor 3	-	+	22	499	57	6.9	NP Sequest and Mascot	SCX Sequest and Mascot	SDS-PAGE Sequest and Mascot
IPI:IPI00166729.4	Zinc-alpha-2-glycoprotein	Zinc-alpha-2-glycoprotein	+	+	21	298	34.2	6.05	NP Sequest and Mascot	SCX Sequest and Mascot	SDS-PAGE Sequest and Mascot
IPI:IPI00296608.6	Complement component C7	Complement component C8	+	+	21	843	93.5	6.48	NP Sequest and Mascot	SCX Sequest and Mascot	SDS-PAGE Sequest and Mascot
IPI:IPI00219713.1	Isoform Gamma-A of Fibrinogen gamma chain	Isoform Gamma-A of Fibrinogen gamma chain	-	-	20	437	49.5	6.09	NP Sequest and Mascot	SCX Sequest and Mascot	SDS-PAGE Sequest and Mascot
IPI:IPI00021842.1	Apolipoprotein E	Apolipoprotein E	+	+	18	317	36.1	5.73	NP Sequest and Mascot	SCX Sequest and Mascot	SDS-PAGE Sequest and Mascot
IPI:IPI00022395.1	Complement component C9	Complement component C10	+	+	18	559	63.1	5.59	NP Sequest and Mascot	SCX Sequest and Mascot	SDS-PAGE Sequest and Mascot
IPI:IPI00795633.1	CLU	CLU	-	-	18	448	52.3	6.38	NP Sequest and Mascot	SCX Sequest and Mascot	SDS-PAGE Sequest and Mascot
IPI:IPI00022371.1	Histidine-rich glycoprotein	Histidine-rich glycoprotein	+	+	16	525	59.5	7.5	NP Sequest and Mascot	SCX Sequest and Mascot	SDS-PAGE Sequest and Mascot
IPI:IPI00294395.1	Complement component C8 beta chain	Complement component C8 beta chain	+	+	16	591	67	8.13	NP Sequest and Mascot	SCX Sequest and Mascot	SDS-PAGE Sequest and Mascot
IPI:IPI00328609.3	Kallistatin	Kallistatin	-	-	16	427	48.5	7.75	NP Sequest and Mascot	SCX Sequest and Mascot	SDS-PAGE Sequest and Mascot
IPI:IPI00966295.1	Light chain of factor I	Light chain of factor I	-	-	16	576	65	7.5	NP Sequest and Mascot	SCX Sequest and Mascot	SDS-PAGE Sequest and Mascot
IPI:IPI00006114.5	Pigment epithelium-derived factor	Pigment epithelium-derived factor	+	+	13	418	46.3	6.38	NP Sequest and Mascot	SCX Sequest and Mascot	SDS-PAGE Sequest and Mascot
IPI:IPI00011252.1	Complement component C8 alpha chain	Complement component C8 alpha chain	+	+	13	584	65.1	6.47	NP Sequest and Mascot	SCX Sequest and Mascot	SDS-PAGE Sequest and Mascot
IPI:IPI00022417.4	Leucine-rich alpha-2-glycoprotein	Leucine-rich alpha-2-glycoprotein	+	+	13	347	38.2	6.95	NP Sequest and Mascot	SCX Sequest and Mascot	SDS-PAGE Sequest and Mascot
IPI:IPI00032220.3	Angiotensinogen	Angiotensinogen	+	+	13	485	53.1	6.32	NP Sequest and Mascot	SCX Sequest and Mascot	SDS-PAGE Sequest and Mascot
IPI:IPI00163207.1	Isoform 1 of N-acetylmuramoyl-L-alanine amidase	Isoform 1 of N-acetylmuramoyl-L-alanine amidase	+	-	13	576	62.2	7.55	NP Sequest and Mascot	SCX Sequest and Mascot	SDS-PAGE Sequest and Mascot
IPI:IPI00020996.5	Insulin-like growth factor-binding protein complex acid labile subunit	Insulin-like growth factor-binding protein complex acid labile subunit	+	+	12	605	66	6.79	NP Sequest and Mascot	SCX Sequest and Mascot	SDS-PAGE Sequest and Mascot
IPI:IPI00296537.4	Isoform C of Fibulin-1	Isoform C of Fibulin-2	+	-	12	683	74.4	5.24	NP Sequest and Mascot	SCX Sequest	SDS-PAGE Sequest
IPI:IPI00298971.1	Vitronectin	Vitronectin	+	+	12	478	54.3	5.8	NP Sequest and Mascot	SCX Sequest and Mascot	SDS-PAGE Sequest and Mascot
IPI:IPI00299503.2	Isoform 1 of Phosphatidylinositol-glycan-specific phospholipase D	Isoform 1 of Phosphatidylinositol-glycan-specific phospholipase D	+	-	12	840	92.3	6.37	NP Sequest and Mascot	SCX Sequest and Mascot	SDS-PAGE Sequest and Mascot
IPI:IPI00022391.1	Serum amyloid P-component	Serum amyloid P-component	+	+	11	223	25.4	6.54	NP Sequest and Mascot	SCX Sequest and Mascot	SDS-PAGE Sequest and Mascot
IPI:IPI00292946.1	Thyroxine-binding globulin	Thyroxine-binding globulin	+	+	11	415	46.3	6.3	NP Sequest and Mascot	SCX Sequest and Mascot	SDS-PAGE Sequest and Mascot
IPI:IPI00480192.1	Retinol binding protein 4, plasma	Retinol binding protein 4, plasma	-	-	10	199	22.9	6.09	NP Sequest and Mascot	SCX Sequest and Mascot	SDS-PAGE Sequest and Mascot
IPI:IPI00010295.1	Carboxypeptidase N catalytic chain	Carboxypeptidase N catalytic chain	+	+	8	458	52.3	7.34	NP Sequest and Mascot	SCX Sequest and Mascot	SDS-PAGE Sequest and Mascot
IPI:IPI00218732.4	Serum paraoxonase/arylesterase 1	Serum paraoxonase/arylesterase 2	+	+	8	355	39.7	5.22	NP Sequest and Mascot	SCX Sequest and Mascot	SDS-PAGE Sequest and Mascot
IPI:IPI00029193.1	Hepatocyte growth factor activator	Hepatocyte growth factor activator	+	+	7	655	70.6	7.24	NP Sequest and Mascot	SCX Sequest and Mascot	SDS-PAGE Sequest and Mascot
IPI:IPI00296099.6	Thrombospondin-1	Thrombospondin-2	+	+	7	1170	129.3	4.94	NP Sequest and Mascot	SCX Sequest and Mascot	SDS-PAGE Sequest
IPI:IPI00887739.3	complement C3-like, partial	complement C3-like, partial	-	-	7	1295	144.7	7.52	NP Sequest and Mascot	SCX Sequest	SDS-PAGE Sequest
IPI:IPI00656111.1	Isoform E of Proteoglycan 4	Isoform E of Proteoglycan 5	-	-	6	933	102.4	9.63	NP Sequest and Mascot	SCX Sequest and Mascot	SDS-PAGE Sequest and Mascot
IPI:IPI00026199.2	Glutathione peroxidase 3	Glutathione peroxidase 4	+	+	5	226	25.5	8.05	NP Sequest and Mascot	SCX Sequest and Mascot	SDS-PAGE Sequest and Mascot
IPI:IPI00032311.4	Lipopolysaccharide-binding protein	Lipopolysaccharide-binding protein	+	+	5	481	53.3	6.7	NP Sequest and Mascot	SCX Sequest and Mascot	SDS-PAGE Sequest
IPI:IPI00218413.2	Biotinidase	Biotinidase	+	+	5	543	61.1	6.25	NP Sequest and Mascot	SCX Sequest and Mascot	SDS-PAGE Sequest and Mascot
IPI:IPI00019576.1	Coagulation factor X	Coagulation factor X	+	+	4	488	54.7	5.94	NP Sequest and Mascot	SCX Sequest	SDS-PAGE Sequest and Mascot
IPI:IPI00027827.2	Extracellular superoxide dismutase [Cu-Zn]	Extracellular superoxide dismutase [Cu-Zn]	+	-	4	240	25.8	6.61	NP Sequest and Mascot	SCX Mascot	SDS-PAGE Sequest and Mascot
IPI:IPI00643948.2	Complement component 1, q subcomponent, B chain	Complement component 1, q subcomponent, B chain	-	-	4	231	24.4	9.16	NP Sequest and Mascot	SCX Sequest and Mascot	SDS-PAGE Sequest and Mascot
IPI:IPI00922213.2	cDNA FLJ53292, highly similar to Homo sapiens fibronectin 1 (FN1), transcript variant 5, mRNA	cDNA FLJ53292, highly similar to Homo sapiens fibronectin 1 (FN1), transcript variant 5, mRNA	-	-	4	1014	111.2	6.21	NP Sequest and Mascot	SCX Mascot	SDS-PAGE Mascot
IPI:IPI00939169.1	Isoform 3 of Attractin	Isoform 3 of Attractin	-	-	4	1198	133.6	6.98	NP Sequest and Mascot	SCX Sequest	SDS-PAGE Sequest and Mascot
IPI:IPI00896419.3	Isoform 1 of Inter-alpha-trypsin inhibitor heavy chain H4	Isoform 1 of Inter-alpha-trypsin inhibitor heavy chain H5	-	-	27	930	103.3	6.98	NP Mascot	SCX Mascot
IPI:IPI00021854.1	Apolipoprotein A-II	Apolipoprotein A-II	-	+	4	100	11.2	6.62	NP Mascot	SCX Sequest
IPI:IPI00064667.4	Beta-Ala-His dipeptidase	Beta-Ala-His dipeptidase	+	+	7	507	56.7	5.3	NP Sequest	SCX Sequest
IPI:IPI00297550.8	Coagulation factor XIII A chain	Coagulation factor XIII A chain	+	+	7	732	83.2	6.09	NP Sequest	SCX Sequest
IPI:IPI00298994.6	Talin-1	Talin-2	+	+	5	2541	269.6	6.07	NP Sequest	SCX Sequest and Mascot
IPI:IPI00923551.1	cDNA FLJ54318, highly similar to Complement C1r subcomponent	cDNA FLJ54318, highly similar to Complement C1r subcomponent	-	-	5	599	68.5	6.13	NP Sequest and Mascot	SCX Sequest
IPI:IPI00021857.1	Apolipoprotein C-III	Apolipoprotein C-III	-	+	4	99	10.8	5.41	NP Sequest and Mascot	SCX Sequest
IPI:IPI00873416.3	Uncharacterized protein	Uncharacterized protein	-	-	10	670	75	5.86	NP Mascot		SDS-PAGE Mascot
IPI:IPI00003351.2	Isoform 1 of Extracellular matrix protein 1	Isoform 1 of Extracellular matrix protein 2	+	-	9	540	60.6	6.71	NP Mascot		SDS-PAGE Sequest
IPI:IPI00792115.1	Putative uncharacterized protein DKFZp686H17246	Putative uncharacterized protein DKFZp686H17247	-	-	5	160	17.8	5.05	NP Mascot		SDS-PAGE Mascot
IPI:IPI00980674.1	Uncharacterized protein	Uncharacterized protein	-	-	5	176	19.3	7.31	NP Mascot		SDS-PAGE Mascot
IPI:IPI00884913.2	sex hormone-binding globulin isoform 4 precursor	sex hormone-binding globulin isoform 4 precursor	-	-	4	287	31.7	6.23	NP Mascot		SDS-PAGE Sequest
IPI:IPI00872573.2	48 kDa protein	49 kDa protein	-	-	3	438	48	7.65	NP Mascot		SDS-PAGE Sequest and Mascot
IPI:IPI00896413.1	inter-alpha (globulin) inhibitor H4 isoform 2 precursor	inter-alpha (globulin) inhibitor H4 isoform 2 precursor	-	-	32	900	99.8	6.47	NP Sequest		SDS-PAGE Sequest and Mascot
IPI:IPI00556459.1	Serine/cysteine proteinase inhibitor clade G member 1 splice variant 2 (Fragment)	Serine/cysteine proteinase inhibitor clade G member 1 splice variant 2 (Fragment)	-	-	11	333	37.3	8	NP Sequest		SDS-PAGE Sequest
IPI:IPI00953573.1	Uncharacterized protein	Uncharacterized protein	-	-	11	885	99.2	5.8	NP Sequest		SDS-PAGE Sequest
IPI:IPI00292218.7	Hepatocyte growth factor-like protein	Hepatocyte growth factor-like protein	-	-	6	711	80.3	7.68	NP Sequest		SDS-PAGE Sequest and Mascot
IPI:IPI00329775.7	Isoform 1 of Carboxypeptidase B2	Isoform 1 of Carboxypeptidase B3	+	-	6	423	48.4	7.71	NP Sequest		SDS-PAGE Sequest
IPI:IPI00006969.2	Isoform 2 of Extracellular matrix protein 1	Isoform 2 of Extracellular matrix protein 2	-	-	5	415	46.1	6.39	NP Sequest		SDS-PAGE Mascot
IPI:IPI00465016.7	Isoform 2 of Sulfhydryl oxidase 1	Isoform 2 of Sulfhydryl oxidase 2	-	-	4	604	66.8	8.56	NP Sequest		SDS-PAGE Sequest
IPI:IPI00749179.2	Uncharacterized protein	Uncharacterized protein	-	-	20	682	75.9	5.2	NP Sequest and Mascot		SDS-PAGE Sequest and Mascot
IPI:IPI00021727.1	C4b-binding protein alpha chain	C4b-binding protein alpha chain	+	+	17	597	67	7.3	NP Sequest and Mascot		SDS-PAGE Sequest and Mascot
IPI:IPI00654888.4	Plasma kallikrein	Plasma kallikrein	+	+	17	638	71.3	8.22	NP Sequest and Mascot		SDS-PAGE Sequest and Mascot
IPI:IPI00022426.1	Protein AMBP	Protein AMBP	+	+	16	352	39	6.25	NP Sequest and Mascot		SDS-PAGE Sequest and Mascot
IPI:IPI00007240.2	Coagulation factor XIII B chain	Coagulation factor XIII B chain	+	+	14	661	75.5	6.39	NP Sequest and Mascot		SDS-PAGE Sequest and Mascot
IPI:IPI00879231.1	Alpha-2-antiplasmin	Alpha-2-antiplasmin	-	+	13	491	54.5	6.29	NP Sequest and Mascot		SDS-PAGE Sequest and Mascot
IPI:IPI00294004.1	Vitamin K-dependent protein S	Vitamin K-dependent protein S	+	+	11	676	75.1	5.67	NP Sequest and Mascot		SDS-PAGE Sequest and Mascot
IPI:IPI00953689.1	Alpha-2-HS-glycoprotein	Alpha-2-HS-glycoprotein	-	+	10	367	39.3	5.72	NP Sequest and Mascot		SDS-PAGE Sequest and Mascot
IPI:IPI00216588.2	Isoform 2 of Coagulation factor XI	Isoform 2 of Coagulation factor XI	-	-	9	573	64	8.27	NP Sequest and Mascot		SDS-PAGE Sequest and Mascot
IPI:IPI00011261.2	Complement component C8 gamma chain	Complement component C8 gamma chain	+	+	8	202	22.3	8.31	NP Sequest and Mascot		SDS-PAGE Sequest and Mascot
IPI:IPI00020986.2	Lumican	Lumican	+	+	8	338	38.4	6.61	NP Sequest and Mascot		SDS-PAGE Sequest and Mascot
IPI:IPI00479116.1	Carboxypeptidase N subunit 2	Carboxypeptidase N subunit 3	+	+	7	545	60.6	5.99	NP Sequest and Mascot		SDS-PAGE Sequest and Mascot
IPI:IPI00022445.1	Platelet basic protein	Platelet basic protein	+	+	4	128	13.9	8.79	NP Sequest and Mascot		SDS-PAGE Sequest and Mascot
IPI:IPI00022394.2	Complement C1q subcomponent subunit C	Complement C1q subcomponent subunit C	+	+	3	245	25.8	8.41	NP Sequest and Mascot		SDS-PAGE Sequest and Mascot
IPI:IPI00395488.2	Vasorin	Vasorin	+	-	3	673	71.7	7.39	NP Sequest and Mascot		SDS-PAGE Sequest
IPI:IPI00967366.1	Uncharacterized protein	Uncharacterized protein	-	-	2	310	35.1	7.66	NP Sequest and Mascot		SDS-PAGE Mascot
IPI:IPI00019359.4	Keratin, type I cytoskeletal 9	Keratin, type I cytoskeletal 10	+	-	31	623	62	5.24		SCX Sequest and Mascot	SDS-PAGE Sequest and Mascot
IPI:IPI00645038.1	Inter-alpha (Globulin) inhibitor H2	Inter-alpha (Globulin) inhibitor H3	-	-	23	935	105.2	7.03		SCX Sequest and Mascot	SDS-PAGE Sequest and Mascot
IPI:IPI00026314.1	Isoform 1 of Gelsolin	Isoform 1 of Gelsolin	-	-	21	782	85.6	6.28		SCX Sequest and Mascot	SDS-PAGE Sequest and Mascot
IPI:IPI00215894.1	Isoform LMW of Kininogen-1	Isoform LMW of Kininogen-2	+	-	20	427	47.9	6.65		SCX Mascot	SDS-PAGE Sequest and Mascot
IPI:IPI00855777.2	Isoform 14 of Fibronectin	Isoform 14 of Fibronectin	-	-	20	2265	249.2	5.99		SCX Sequest	SDS-PAGE Sequest
IPI:IPI00972938.1	Coagulation factor IX	Coagulation factor IX	-	-	8	423	47.6	6.11		SCX Sequest	SDS-PAGE Sequest
IPI:IPI00019581.1	Coagulation factor XII	Coagulation factor XII	+	+	7	615	67.8	7.74		SCX Sequest	SDS-PAGE Sequest
IPI:IPI00165972.3	Complement factor D preproprotein	Complement factor D preproprotein	-	-	7	260	27.8	7.25		SCX Sequest and Mascot	SDS-PAGE Sequest and Mascot
IPI:IPI00171678.4	Dopamine beta-hydroxylase	Dopamine beta-hydroxylase	+	+	6	617	69	6.42		SCX Sequest and Mascot	SDS-PAGE Sequest
IPI:IPI00945517.1	59 kDa protein	60 kDa protein	-	-	6	525	58.9	6.79		SCX Sequest	SDS-PAGE Sequest
IPI:IPI00003362.2	HSPA5 protein	HSPA5 protein	+	+	5	655	72.4	5.16		SCX Sequest	SDS-PAGE Sequest
IPI:IPI00019581.2	Coagulation factor XII	Coagulation factor XII	+	-	5	615	67.7	7.74		SCX Mascot	SDS-PAGE Mascot
IPI:IPI00465436.4	Catalase	Catalase	+	+	5	527	59.7	7.39		SCX Sequest and Mascot	SDS-PAGE Sequest
IPI:IPI00967977.1	Uncharacterized protein	Uncharacterized protein	-	-	5	213	23.3	5.26		SCX Sequest	SDS-PAGE Sequest
IPI:IPI00296176.2	Coagulation factor IX	Coagulation factor IX	+	+	4	461	51.7	5.47		SCX Mascot	SDS-PAGE Sequest and Mascot
IPI:IPI00216773.5	Uncharacterized protein	Uncharacterized protein	-	-	9	396	45.1	6.1	NP Mascot
IPI:IPI00064667.5	Beta-Ala-His dipeptidase	Beta-Ala-His dipeptidase	+	-	6	507	56.7	5.3	NP Mascot
IPI:IPI00003590.2	Isoform 1 of Sulfhydryl oxidase 1	Isoform 1 of Sulfhydryl oxidase 2	+	-	5	747	82.5	8.92	NP Mascot
IPI:IPI00977578.1	cDNA FLJ53487, highly similar to Coagulation factor XIII A chain	cDNA FLJ53487, highly similar to Coagulation factor XIII A chain	-	-	4	626	70.3	5.34	NP Mascot
IPI:IPI00218876.3	Isoform 2 of C-reactive protein	Isoform 2 of C-reactive protein	-	-	3	91	10.4	9.17	NP Mascot
IPI:IPI00293057.6	Isoform 2 of Carboxypeptidase B2	Isoform 2 of Carboxypeptidase B3	-	-	3	360	40.9	7.53	NP Mascot
IPI:IPI00419744.4	Isoform 2 of Ficolin-3	Isoform 2 of Ficolin-4	-	-	3	288	31.7	6.84	NP Mascot
IPI:IPI00924973.1	Isoform 4 of Mannan-binding lectin serine protease 1	Isoform 4 of Mannan-binding lectin serine protease 2	-	-	3	615	68.9	5.34	NP Mascot
IPI:IPI00925358.1	cDNA FLJ53634, highly similar to Insulin-like growth factor-binding protein 3	cDNA FLJ53634, highly similar to Insulin-like growth factor-binding protein 4	-	-	3	246	27.3	8.82	NP Mascot
IPI:IPI00020019.1	Adiponectin	Adiponectin	+	-	2	244	26.4	5.74	NP Mascot
IPI:IPI00218639.3	Isoform XB-short of Tenascin-X	Isoform XB-short of Tenascin-X	-	-	2	673	74	6.04	NP Mascot
IPI:IPI00748955.3	Platelet glycoprotein Ib alpha chain	Platelet glycoprotein Ib alpha chain	-	-	2	626	68.9	6.68	NP Mascot
IPI:IPI00910625.1	cDNA FLJ51265, moderately similar to Beta-2-glycoprotein 1	cDNA FLJ51265, moderately similar to Beta-2-glycoprotein 2	-	-	2	274	30.3	7.85	NP Mascot
IPI:IPI00216773.4	ALB protein	ALB protein	-	-	5	396	45.1	6.1	NP Sequest
IPI:IPI00023019.1	Isoform 1 of Sex hormone-binding globulin	Isoform 1 of Sex hormone-binding globulin	+	-	4	402	43.8	6.71	NP Sequest
IPI:IPI00029260.2	Monocyte differentiation antigen CD14	Monocyte differentiation antigen CD15	+	+	4	375	40.1	6.23	NP Sequest
IPI:IPI00290283.6	Isoform 2 of Mannan-binding lectin serine protease 1	Isoform 2 of Mannan-binding lectin serine protease 2	+	-	3	728	81.8	5.12	NP Sequest
IPI:IPI00790784.2	Isoform 2 of Alpha-1-antitrypsin	Isoform 2 of Alpha-1-antitrypsin	-	-	2	359	40.2	5.47	NP Sequest
IPI:IPI00305461.4	Inter-alpha (Globulin) inhibitor H2, isoform CRA_a	Inter-alpha (Globulin) inhibitor H2, isoform CRA_a	-	-	22	947	106.5	6.95	NP Sequest and Mascot
IPI:IPI00646773.2	Isoform 2 of Gelsolin	Isoform 2 of Gelsolin	-	-	21	731	80.6	5.85	NP Sequest and Mascot
IPI:IPI00021856.3	Apolipoprotein C-II	Apolipoprotein C-II	+	+	5	101	11.3	4.72	NP Sequest and Mascot
IPI:IPI00894365.2	cDNA FLJ52842, highly similar to Actin, cytoplasmic 1	cDNA FLJ52842, highly similar to Actin, cytoplasmic 2	-	-	5	351	39.2	5.59	NP Sequest and Mascot
IPI:IPI00025426.3	Isoform 1 of Pregnancy zone protein	Isoform 1 of Pregnancy zone protein	+	-	4	1482	163.8	6.38	NP Sequest and Mascot
IPI:IPI00025864.5	Butyrylcholinesterase, isoform CRA_b	Butyrylcholinesterase, isoform CRA_b	+	-	4	643	72.8	7.55	NP Sequest and Mascot
IPI:IPI00553061.2	GUGU gamma form	GUGU gamma form	-	-	2	317	34.5	6.02	NP Sequest and Mascot
IPI:IPI00853525.1	Apolipoprotein A1	Apolipoprotein A2	-	-	2	245	27.9	6.13	NP Sequest and Mascot
IPI:IPI00910166.1	cDNA FLJ51093, highly similar to Cadherin-5	cDNA FLJ51093, highly similar to Cadherin-6	-	-	2	750	83.9	5.5	NP Sequest and Mascot
IPI:IPI00922043.2	cDNA FLJ55742, highly similar to Inter-alpha-trypsin inhibitor heavy chain H4	cDNA FLJ55742, highly similar to Inter-alpha-trypsin inhibitor heavy chain H5	-	-	19	888	98.3	6.6		SCX Sequest
IPI:IPI00384697.2	Isoform 2 of Serum albumin	Isoform 2 of Serum albumin	-	-	10	417	47.3	6.35		SCX Mascot
IPI:IPI00965713.3	fibrinogen beta chain isoform 2 preproprotein	fibrinogen beta chain isoform 2 preproprotein	-	-	8	432	49.9	8.02		SCX Mascot
IPI:IPI00879608.2	alpha-2-antiplasmin isoform b precursor	alpha-2-antiplasmin isoform b precursor	-	-	7	427	47.9	6.1		SCX Sequest and Mascot
IPI:IPI00794403.1	23 kDa protein	24 kDa protein	-	-	6	202	23.1	8.51		SCX Sequest and Mascot
IPI:IPI00293057.5	Isoform 2 of Carboxypeptidase B2	Isoform 2 of Carboxypeptidase B3	-	-	5	360	40.9	7.53		SCX Sequest
IPI:IPI00942927.1	cDNA FLJ57339, highly similar to Complement C3	cDNA FLJ57339, highly similar to Complement C4	-	-	5	1098	122.5	6.93		SCX Mascot
IPI:IPI00027482.1	Corticosteroid-binding globulin	Corticosteroid-binding globulin	+	+	4	405	45.1	6.04		SCX Sequest and Mascot
IPI:IPI00221224.6	Aminopeptidase N	Aminopeptidase N	+	+	4	967	109.5	5.48		SCX Sequest and Mascot
IPI:IPI00884981.2	Isoform 2 of Pregnancy zone protein	Isoform 2 of Pregnancy zone protein	-	-	4	1268	140.3	6.29		SCX Sequest and Mascot
IPI:IPI00022392.1	Complement C1q subcomponent subunit A	Complement C1q subcomponent subunit A	+	+	3	245	26	9.11		SCX Sequest and Mascot
IPI:IPI00291866.5	Plasma protease C1 inhibitor	Plasma protease C1 inhibitor	+	+	3	500	55.1	6.55		SCX Sequest
IPI:IPI00451626.1	Isoform 3 of Cartilage acidic protein 1	Isoform 3 of Cartilage acidic protein 2	-	-	3	628	68	5.29		SCX Sequest and Mascot
IPI:IPI00796990.3	cDNA FLJ58124, highly similar to Complement factor I	cDNA FLJ58124, highly similar to Complement factor I	-	-	3	591	66.7	7.52		SCX Sequest and Mascot
IPI:IPI00929685.1	sex hormone-binding globulin isoform 2 precursor	sex hormone-binding globulin isoform 2 precursor	-	-	3	384	41.7	6.71		SCX Sequest
IPI:IPI00028931.2	Desmoglein-2	Desmoglein-3	+	-	2	1118	122.2	5.24		SCX Sequest and Mascot
IPI:IPI00217291.2	Isoform 2 of Neogenin	Isoform 2 of Neogenin	-	-	2	1408	154.2	6.37		SCX Sequest
IPI:IPI00789173.1	Uncharacterized protein	Uncharacterized protein	-	-	2	137	14.8	5.54		SCX Sequest
IPI:IPI00853061.1	collagen alpha-3(VI) chain isoform 2 precursor	collagen alpha-3(VI) chain isoform 2 precursor	-	-	2	1036	113.2	5.76		SCX Sequest
IPI:IPI00877104.1	Protein C (Fragment)	Protein C (Fragment)	-	-	2	211	23.3	5.02		SCX Sequest
IPI:IPI00902485.3	Protein C	Protein C	-	-	2	236	26.4	5.72		SCX Mascot
IPI:IPI00909399.2	xaa-Pro dipeptidase isoform 3	xaa-Pro dipeptidase isoform 4	-	-	2	429	47.2	6.07		SCX Mascot
IPI:IPI00973192.1	cDNA FLJ55738, highly similar to Coagulation factor VII	cDNA FLJ55738, highly similar to Coagulation factor VII	-	-	2	397	43.6	7.18		SCX Sequest
IPI:IPI00978296.1	Uncharacterized protein	Uncharacterized protein	-	-	2	87	9.4	9.58		SCX Mascot
IPI:IPI00220327.4	Keratin, type II cytoskeletal 1	Keratin, type II cytoskeletal 2	+	-	36	644	66	8.12			SDS-PAGE Sequest and Mascot
IPI:IPI00021304.1	Keratin, type II cytoskeletal 2 epidermal	Keratin, type II cytoskeletal 2 epidermal	+	-	26	645	65.8	8			SDS-PAGE Sequest and Mascot
IPI:IPI00296165.6	cDNA FLJ54471, highly similar to Complement C1r subcomponent	cDNA FLJ54471, highly similar to Complement C1r subcomponent	-	+	18	719	81.8	6.37			SDS-PAGE Sequest and Mascot
IPI:IPI00298828.3	Beta-2-glycoprotein 1	Beta-2-glycoprotein 2	+	+	13	345	38.3	7.97			SDS-PAGE Sequest and Mascot
IPI:IPI00384444.6	Keratin, type I cytoskeletal 14	Keratin, type I cytoskeletal 15	+	-	11	472	51.5	5.16			SDS-PAGE Sequest and Mascot
IPI:IPI00218803.3	Isoform B of Fibulin-1	Isoform B of Fibulin-2	+	-	10	703	77.1	5.26			SDS-PAGE Sequest
IPI:IPI00745872.2	Isoform 1 of Serum albumin	Isoform 1 of Serum albumin	-	-	10	609	69.3	6.28			SDS-PAGE Sequest
IPI:IPI00796776.1	cDNA FLJ54081, highly similar to Keratin, type II cytoskeletal 5	cDNA FLJ54081, highly similar to Keratin, type II cytoskeletal 6	-	-	10	567	60.1	6.19			SDS-PAGE Sequest
IPI:IPI00009867.3	Keratin, type II cytoskeletal 5	Keratin, type II cytoskeletal 6	+	-	9	590	62.3	7.74			SDS-PAGE Mascot
IPI:IPI00293665.9	Keratin, type II cytoskeletal 6B	Keratin, type II cytoskeletal 6B	+	-	9	564	60	8			SDS-PAGE Sequest
IPI:IPI00011264.2	Complement factor H-related protein 1	Complement factor H-related protein 2	+	-	8	330	37.6	7.39			SDS-PAGE Sequest and Mascot
IPI:IPI00398625.5	Hornerin	Hornerin	-	-	8	2850	282.2	10.04			SDS-PAGE Sequest and Mascot
IPI:IPI00025753.2	Desmoglein-1	Desmoglein-2	+	-	7	1049	113.7	5.03			SDS-PAGE Sequest and Mascot
IPI:IPI00217963.3	Keratin, type I cytoskeletal 16	Keratin, type I cytoskeletal 17	-	-	7	473	51.2	5.05			SDS-PAGE Sequest and Mascot
IPI:IPI00007221.1	Plasma serine protease inhibitor	Plasma serine protease inhibitor	+	+	6	406	45.7	9.26			SDS-PAGE Sequest
IPI:IPI00964994.1	hyaluronan-binding protein 2 isoform 2	hyaluronan-binding protein 2 isoform 3	-	-	6	534	59.8	6.43			SDS-PAGE Sequest
IPI:IPI00965913.1	Protein	Protein	-	-	6	454	51.5	6.95			SDS-PAGE Mascot
IPI:IPI00004373.1	Mannose-binding protein C	Mannose-binding protein C	+	+	5	248	26.1	5.49			SDS-PAGE Sequest and Mascot
IPI:IPI00217182.5	Isoform DPII of Desmoplakin	Isoform DPII of Desmoplakin	+	-	5	2272	260	6.96			SDS-PAGE Sequest
IPI:IPI00218949.1	Isoform Short of Complement factor H-related protein 2	Isoform Short of Complement factor H-related protein 3	-	-	5	243	27.9	6.92			SDS-PAGE Sequest and Mascot
IPI:IPI00299307.5	Isoform 1 of Mannan-binding lectin serine protease 1	Isoform 1 of Mannan-binding lectin serine protease 2	+	-	5	699	79.2	5.49			SDS-PAGE Sequest
IPI:IPI00554711.3	Junction plakoglobin	Junction plakoglobin	+	-	5	745	81.7	6.14			SDS-PAGE Sequest and Mascot
IPI:IPI00922935.1	cDNA FLJ35535 fis, clone SPLEN2002419, highly similar to EGF-containing fibulin-like extracellular matrix protein 1	cDNA FLJ35535 fis, clone SPLEN2002419, highly similar to EGF-containing fibulin-like extracellular matrix protein 2	-	-	5	349	39.4	5.54			SDS-PAGE Sequest and Mascot
IPI:IPI00021439.1	Actin, cytoplasmic 1	Actin, cytoplasmic 2	+	-	4	375	41.7	5.48			SDS-PAGE Sequest
IPI:IPI00303476.1	ATP synthase subunit beta, mitochondrial	ATP synthase subunit beta, mitochondrial	-	+	4	529	56.5	5.4			SDS-PAGE Sequest and Mascot
IPI:IPI00376379.4	Keratin, type II cytoskeletal 1b	Keratin, type II cytoskeletal 1b	+	-	4	578	61.9	5.99			SDS-PAGE Sequest and Mascot
IPI:IPI00021841.1	Apolipoprotein A-I	Apolipoprotein A-I	+	+	3	267	30.8	5.76			SDS-PAGE Sequest
IPI:IPI00022974.1	Prolactin-inducible protein	Prolactin-inducible protein	+	-	3	146	16.6	8.05			SDS-PAGE Sequest
IPI:IPI00025204.1	CD5 antigen-like	CD5 antigen-like	+	+	3	347	38.1	5.47			SDS-PAGE Sequest
IPI:IPI00032325.1	Cystatin-A	Cystatin-A	+	-	3	98	11	5.5			SDS-PAGE Sequest
IPI:IPI00219037.5	Histone H2A.x	Histone H2A.x	-	-	3	143	15.1	10.74			SDS-PAGE Sequest and Mascot
IPI:IPI00297779.7	T-complex protein 1 subunit beta	T-complex protein 1 subunit beta	-	-	3	535	57.5	6.46			SDS-PAGE Sequest
IPI:IPI00397801.4	Filaggrin-2	Filaggrin-3	+	-	3	2391	247.9	8.31			SDS-PAGE Sequest and Mascot
IPI:IPI00414676.6	Heat shock protein HSP 90-beta	Heat shock protein HSP 90-beta	-	-	3	724	83.2	5.03			SDS-PAGE Sequest and Mascot
IPI:IPI00450768.7	Keratin, type I cytoskeletal 17	Keratin, type I cytoskeletal 18	+	-	3	432	48.1	5.02			SDS-PAGE Sequest
IPI:IPI00453473.6	Histone H4	Histone H5	+	-	3	103	11.4	11.36			SDS-PAGE Sequest
IPI:IPI00607763.1	Isoform 3 of Multiple inositol polyphosphate phosphatase 1	Isoform 3 of Multiple inositol polyphosphate phosphatase 2	-	-	3	284	31.5	8.92			SDS-PAGE Sequest
IPI:IPI00784154.1	60 kDa heat shock protein, mitochondrial	61 kDa heat shock protein, mitochondrial	-	+	3	573	61	5.87			SDS-PAGE Sequest and Mascot
IPI:IPI00791634.4	Uncharacterized protein	Uncharacterized protein	-	-	3	214	23.6	6.81			SDS-PAGE Sequest
IPI:IPI00795055.1	cDNA FLJ14022 fis, clone HEMBA1003538, weakly similar to COMPLEMENT C1R COMPONENT	cDNA FLJ14022 fis, clone HEMBA1003538, weakly similar to COMPLEMENT C1R COMPONENT	-	-	3	438	48	7.46			SDS-PAGE Sequest
IPI:IPI00853045.1	Anti-RhD monoclonal T125 kappa light chain	Anti-RhD monoclonal T125 kappa light chain	-	-	3	234	25.7	8.43			SDS-PAGE Sequest
IPI:IPI00908791.2	L-lactate dehydrogenase	L-lactate dehydrogenase	-	-	3	306	33.7	8.46			SDS-PAGE Sequest and Mascot
IPI:IPI00909059.5	cDNA FLJ53910, highly similar to Keratin, type II cytoskeletal 6A	cDNA FLJ53910, highly similar to Keratin, type II cytoskeletal 6A	-	-	3	535	57.8	8			SDS-PAGE Mascot
IPI:IPI00917825.2	Uncharacterized protein	Uncharacterized protein	-	-	3	332	37.6	9.23			SDS-PAGE Mascot
IPI:IPI00946489.1	cDNA FLJ16673 fis, clone THYMU3003403, highly similar to Properdin	cDNA FLJ16673 fis, clone THYMU3003403, highly similar to Properdin	-	-	3	415	45.1	8.13			SDS-PAGE Sequest
IPI:IPI00006662.1	Apolipoprotein D	Apolipoprotein D	+	+	2	189	21.3	5.15			SDS-PAGE Sequest
IPI:IPI00013164.4	Isoform 1 of Peripherin	Isoform 1 of Peripherin	-	-	2	470	53.6	5.47			SDS-PAGE Sequest
IPI:IPI00013179.1	Prostaglandin-H2 D-isomerase	Prostaglandin-H2 D-isomerase	+	+	2	190	21	7.8			SDS-PAGE Sequest and Mascot
IPI:IPI00019038.1	Lysozyme C	Lysozyme C	+	-	2	148	16.5	9.16			SDS-PAGE Sequest
IPI:IPI00022731.1	Apolipoprotein C-IV	Apolipoprotein C-IV	+	+	2	127	14.5	8.92			SDS-PAGE Sequest
IPI:IPI00339274.5	Histone H2A type 2-C	Histone H2A type 2-C	-	-	2	129	14	10.9			SDS-PAGE Sequest and Mascot
IPI:IPI00418471.6	Vimentin	Vimentin	+	+	2	466	53.6	5.12			SDS-PAGE Sequest
IPI:IPI00645213.1	Apolipoprotein M, isoform CRA_a	Apolipoprotein M, isoform CRA_a	-	-	2	116	13	7.75			SDS-PAGE Sequest
IPI:IPI00645500.3	cDNA FLJ55526, highly similar to Complement C2	cDNA FLJ55526, highly similar to Complement C3	-	-	2	723	80.1	7.46			SDS-PAGE Sequest
IPI:IPI00646384.1	13 kDa protein	14 kDa protein	-	-	2	118	13.1	5.47			SDS-PAGE Sequest
IPI:IPI00743766.2	Fetuin-B	Fetuin-B	-	-	2	382	42	6.83			SDS-PAGE Sequest
IPI:IPI00749466.2	cDNA FLJ61201, highly similar to Beta-Ala-His dipeptidase	cDNA FLJ61201, highly similar to Beta-Ala-His dipeptidase	-	-	2	493	55.2	5.24			SDS-PAGE Sequest
IPI:IPI00789477.1	cDNA FLJ58679, highly similar to Lactotransferrin	cDNA FLJ58679, highly similar to Lactotransferrin	-	-	2	666	73.1	7.85			SDS-PAGE Sequest
IPI:IPI00797221.7	Glyceraldehyde-3-phosphate dehydrogenase	Glyceraldehyde-3-phosphate dehydrogenase	-	-	2	267	28.6	9.09			SDS-PAGE Sequest
IPI:IPI00797452.2	cDNA FLJ55805, highly similar to Keratin, type II cytoskeletal 4	cDNA FLJ55805, highly similar to Keratin, type II cytoskeletal 5	-	-	2	474	51.7	6.81			SDS-PAGE Mascot
IPI:IPI00828004.1	Multi-functional protein MFP	Multi-functional protein MFP	-	-	2	261	26.7	9.32			SDS-PAGE Sequest
IPI:IPI00843942.1	Complement factor H-related protein 5	Complement factor H-related protein 6	-	+	2	569	64.4	7.06			SDS-PAGE Sequest
IPI:IPI00852577.2	HCG2040025	HCG2040026	-	-	2	106	11.4	7.87			SDS-PAGE Sequest
IPI:IPI00868874.1	Isoform 8 of Collectin-11	Isoform 8 of Collectin-12	-	-	2	197	21.6	4.75			SDS-PAGE Sequest
IPI:IPI00908963.1	ATP synthase subunit alpha	ATP synthase subunit alpha	-	-	2	531	57.5	9.22			SDS-PAGE Sequest
IPI:IPI00909570.1	cDNA FLJ56548, highly similar to Elongation factor 2	cDNA FLJ56548, highly similar to Elongation factor 3	-	-	2	566	62.8	6.1			SDS-PAGE Sequest
IPI:IPI00909594.1	cDNA FLJ58413, highly similar to Complement component C7	cDNA FLJ58413, highly similar to Complement component C8	-	-	2	486	53.7	5.4			SDS-PAGE Sequest and Mascot
IPI:IPI00916517.1	Uncharacterized protein	Uncharacterized protein	-	-	2	317	34.2	9			SDS-PAGE Mascot
IPI:IPI00930144.1	Histone H2A	Histone H2A	-	-	2	111	12.1	10.4			SDS-PAGE Sequest
IPI:IPI00939493.1	Isoform 1 of Monofunctional C1-tetrahydrofolate synthase, mitochondrial	Isoform 1 of Monofunctional C1-tetrahydrofolate synthase, mitochondrial	-	-	2	978	105.7	8.06			SDS-PAGE Sequest
IPI:IPI00940493.1	cDNA FLJ51179, highly similar to Vitamin K-dependent protein C	cDNA FLJ51179, highly similar to Vitamin K-dependent protein C	-	-	2	421	46	7.93			SDS-PAGE Sequest
IPI:IPI00956313.1	Uncharacterized protein	Uncharacterized protein	-	-	2	542	58.3	8			SDS-PAGE Mascot
IPI:IPI00975690.1	Vimentin variant 3	Vimentin variant 4	-	-	2	431	49.6	5.25			SDS-PAGE Mascot
IPI:IPI00977506.1	Uncharacterized protein	Uncharacterized protein	-	-	2	204	22.6	6.35			SDS-PAGE Mascot
Single peptide-based IDs identified in atleast two of the workflows
IPI:IPI00019399.2	Serum amyloid A-4 protein	Serum amyloid A-4 protein	+	+	2	130	14.7	9.07	NP Sequest and Mascot	SCX Sequest and Mascot	SDS-PAGE Sequest
IPI:IPI00794777.1	Uncharacterized protein	Uncharacterized protein	-	-	2	136	15.1	6.13	NP Sequest and Mascot	SCX Sequest and Mascot	SDS-PAGE Sequest
IPI:IPI00815947.1	Truncated beta-globin (Fragment)	Truncated beta-globin (Fragment)	-	-	2	40	4.5	9.47	NP Sequest and Mascot	SCX Sequest	SDS-PAGE Sequest
IPI:IPI00910249.1	cDNA FLJ59562, highly similar to Cartilage oligomeric matrix protein	cDNA FLJ59562, highly similar to Cartilage oligomeric matrix protein	-	-	2	704	77.2	4.53	NP Sequest and Mascot	SCX Sequest and Mascot	SDS-PAGE Sequest
IPI:IPI00956045.1	Intercellular adhesion molecule 2, isoform CRA_b	Intercellular adhesion molecule 2, isoform CRA_b	-	-	2	255	27.8	6.89	NP Sequest and Mascot	SCX Sequest and Mascot
IPI:IPI00909087.1	cDNA FLJ60453, highly similar to Proprotein convertase subtilisin/kexin type 9	cDNA FLJ60453, highly similar to Proprotein convertase subtilisin/kexin type 10	-	-	2	205	23.1	5.58	NP mascot	SCX Sequest
IPI:IPI00550145.3	NOELIN1_V2	NOELIN1_V3	-	-	2	458	52.8	7.11	NP Sequest and Mascot	SCX Sequest
IPI:IPI00216699.1	Isoform 2 of Fermitin family homolog 3	Isoform 2 of Fermitin family homolog 4	+	-	2	663	75.4	6.77	NP Sequest	SCX Sequest
IPI:IPI00909658.1	cDNA FLJ52759, highly similar to Plastin-2	cDNA FLJ52759, highly similar to Plastin-3	-	-	2	196	21.8	5.44	NP Sequest		SDS-PAGE Sequest
IPI:IPI00003362.3	78 kDa glucose-regulated protein	79 kDa glucose-regulated protein	+	-	2	654	72.3	5.16		SCX Mascot	SDS-PAGE mascot
IPI:IPI00007047.1	Protein S100-A8	Protein S100-A9	+	+	2	93	10.8	7.03		SCX Mascot	SDS-PAGE Sequest and Mascot
IPI:IPI00015309.1	Keratin, type I cytoskeletal 12	Keratin, type I cytoskeletal 13	-	-	2	494	53.5	4.78		SCX Sequest	SDS-PAGE Sequest
IPI:IPI00020599.1	Calreticulin	Calreticulin	+	+	2	417	48.1	4.44		SCX Sequest	SDS-PAGE Sequest and Mascot
IPI:IPI00027843.1	Isoform 1 of Vitamin K-dependent protein Z	Isoform 1 of Vitamin K-dependent protein Z	+	-	2	400	44.7	5.97		SCX Sequest and Mascot	SDS-PAGE Sequest
IPI:IPI00219426.1	Isoform Gamma of Poliovirus receptor	Isoform Gamma of Poliovirus receptor	-	-	2	364	39.3	6.21		SCX Sequest and Mascot	SDS-PAGE Sequest
IPI:IPI00479010.1	Uncharacterized protein	Uncharacterized protein	-	-	2	128	14.2	9.51		SCX Sequest and Mascot	SDS-PAGE Sequest
IPI:IPI00895858.1	72 kDa type IV collagenase isoform b	73 kDa type IV collagenase isoform b	-	-	2	610	68.8	5.34		SCX Sequest and Mascot	SDS-PAGE mascot
IPI:IPI00939362.1	Uncharacterized protein	Uncharacterized protein	-	-	2	79	9.4	5		SCX Sequest	SDS-PAGE Sequest
IPI:IPI00032293.1	Cystatin-C		+	+	1	146	15.7891	8.74854	NP Sequest and Mascot	SCX Sequest	SDS-PAGE Sequest
IPI:IPI00306378.5	Isoform 2 of Mannan-binding lectin serine protease 2		-	-	1	185	20.6159	5.96045	NP Sequest and Mascot	SCX Sequest and Mascot	SDS-PAGE Sequest
IPI:IPI00744919.1	cDNA FLJ39190 fis, clone OCBBF2004647, highly similar to ARFAPTIN 1		-	-	1	245	28.398	7.72314	NP mascot	SCX Mascot
IPI:IPI00792416.1	10 kDa protein	Mediator complex subunit 30 [Homo sapiens]	-	-	1	90	10.1662	9.83252	NP mascot	SCX Sequest and Mascot
IPI:IPI00009028.1	Tetranectin		+	+	1	202	22.5523	5.66846	NP Sequest		SDS-PAGE Sequest
IPI:IPI00216691.5	Profilin-1		+	-	1	140	15.0446	8.26514	NP Sequest		SDS-PAGE Sequest
IPI:IPI00470637.3	Long-chain fatty acid transport protein 6		-	-	1	619	70.0666	8.51416	NP mascot		SDS-PAGE mascot
IPI:IPI00845307.1	Isoform 4 of Metalloreductase STEAP3		-	-	1	456	50.467	7.86963	NP Sequest		SDS-PAGE Sequest
IPI:IPI00847179.1	apolipoprotein A-IV precursor		-	-	1	396	45.3445	5.37646	NP Sequest		SDS-PAGE Sequest
IPI:IPI00914948.1	apolipoprotein L1 isoform c precursor		-	-	1	380	42.132	5.79541	NP Sequest and Mascot		SDS-PAGE Sequest
IPI:IPI00299435.3	apolipoprotein F precursor		+	+	1	326	35.377	5.64307		SCX Sequest	SDS-PAGE Sequest
IPI:IPI00552199.4	Uncharacterized protein	serpin peptidase inhibitor, clade A (alpha-1 antiproteinase, antitrypsin), member 5	-	-	1	345	37.7989	7.10791		SCX Mascot	SDS-PAGE mascot
Single peptide-based IDs identified in one of the workflows
IPI:IPI00796189.1	cDNA FLJ33173 fis, clone ADRGL2002191, highly similar to ICOS ligand	cDNA FLJ33173 fis, clone ADRGL2002191, highly similar to ICOS ligand	-	-	2	185	20.1	5.83	NP Sequest and Mascot
IPI:IPI00027547.2	Dermcidin	Dermcidin	+	+	2	110	11.3	6.54			SDS-PAGE Sequest and Mascot
IPI:IPI00386975.3	Isoform 1B of Desmocollin-1	Isoform 1B of Desmocollin-2	-	-	2	840	93.8	5.53			SDS-PAGE Sequest and Mascot
IPI:IPI00514908.1	Keratinocyte proline-rich protein	Keratinocyte proline-rich protein	-	-	2	579	64.1	8.27			SDS-PAGE Sequest and Mascot
IPI:IPI00947285.1	suprabasin isoform 1 precursor	suprabasin isoform 1 precursor	-	-	2	590	60.5	7.01			SDS-PAGE Sequest and Mascot
IPI:IPI00003515.2	Thyroid receptor-interacting protein 11		-	-	1	1979	227.447	5.26221	NP Sequest
IPI:IPI00024046.2	cDNA FLJ52398, highly similar to Cadherin-13		+	-	1	760	83.3561	5.12256	NP Sequest and Mascot
IPI:IPI00032328.2	Isoform HMW of Kininogen-1		+	-	1	644	71.9122	6.81494	NP Sequest and Mascot
IPI:IPI00164229.1	Apolipoprotein (Fragment)		-	-	1	113	12.8068	5.75732	NP mascot
IPI:IPI00166036.3	Leucine-rich repeat-containing protein 8B		-	-	1	803	92.3305	6.85889	NP mascot
IPI:IPI00385751.5	Uncharacterized protein		-	-	1	445	51.2366	6.84424	NP Sequest and Mascot
IPI:IPI00442603.1	CDNA FLJ26814 fis, clone PRS06344		-	-	1	277	29.5457	10.9897	NP mascot
IPI:IPI00514208.1	Prostaglandin D2 synthase 21kDa		-	-	1	160	16.8605	9.33447	NP Sequest and Mascot
IPI:IPI00514530.5	Uncharacterized protein	heterogeneous nuclear ribonucleoprotein A2/B1	-	-	1	289	32.2539	5.31299	NP Sequest
IPI:IPI00644531.1	21 kDa protein		-	-	1	187	21.0725	7.81104	NP Sequest and Mascot
IPI:IPI00654663.2	NRG2 protein		-	-	1	280	31.0687	9.0708	NP Sequest
IPI:IPI00746125.1	Putative uncharacterized protein pp6318		-	-	1	390	44.0822	6.55127	NP mascot
IPI:IPI00783390.3	Isoform 1 of Neural cell adhesion molecule L1-like protein		-	-	1	1208	134.987	5.75732	NP mascot
IPI:IPI00844511.1	Mannosyl-oligosaccharide 1,2-alpha-mannosidase IA		-	-	1	653	72.9223	6.46826	NP Sequest and Mascot
IPI:IPI00845506.1	Isoform 2 of Peptidase inhibitor 16		-	-	1	270	29.6545	5.70654	NP Sequest and Mascot
IPI:IPI00847792.2	Similar to EGF-like domain-containing protein 7 precursor		-	-	1	230	23.5006	9.56885	NP Sequest
IPI:IPI00883722.1	Complement factor H-related 1		-	-	1	271	30.8379	7.81104	NP Sequest and Mascot
IPI:IPI00910683.2	cDNA FLJ59557, highly similar to 2-oxoglutarate dehydrogenase E1 component, mitochondrial		-	-	1	873	98.9525	7.45947	NP mascot
IPI:IPI00922445.1	cDNA FLJ52540, highly similar to Lysosome-associated membrane glycoprotein 2		-	-	1	300	32.9588	6.87354	NP Sequest and Mascot
IPI:IPI00922577.1	cDNA FLJ53768, highly similar to Hepatocyte growth factor-like protein		-	-	1	164	17.823	9.11475	NP mascot
IPI:IPI00924814.1	cDNA FLJ34426 fis, clone HHDPC2008474, moderately similar to Insulin-like growth factor-binding protein 3		-	-	1	75	8.67235	9.5835	NP Sequest
IPI:IPI00924859.1	kininogen-1 isoform 3		-	-	1	391	43.7936	6.43018	NP Sequest
IPI:IPI00925319.1	Uncharacterized protein	40S ribosomal protein S7	-	-	1	96	10.3304	5.2876	NP Sequest
IPI:IPI00946528.3	CDK5RAP2 protein (Fragment)		-	-	1	314	35.7325	5.13525	NP Sequest
IPI:IPI00952698.1	disks large homolog 3 isoform c		-	-	1	366	42.0852	8.5874	NP Sequest
IPI:IPI00956726.1	TRIM1 beta		-	-	1	685	77.8686	7.04932	NP Sequest and Mascot
IPI:IPI00966527.1	Uncharacterized protein	VIP36-like protein	-	-	1	65	7.26784	9.979	NP Sequest and Mascot
IPI:IPI00973306.1	34 kDa protein		-	-	1	311	33.673	5.37646	NP Sequest
IPI:IPI00000513.1	E-cadherin		+	-	1	821	90.8856	4.75439		SCX Sequest and Mascot
IPI:IPI00004656.3	Beta-2-microglobulin		+	-	1	119	13.7059	6.52197		SCX Sequest
IPI:IPI00011588.3	Platelet-activating factor acetylhydrolase		+	-	1	441	50.0453	7.56201		SCX Sequest
IPI:IPI00014572.2	Secreted protein, acidic, cysteine-rich (Osteonectin), isoform CRA_a		+	-	1	315	36.0273	4.88135		SCX Sequest
IPI:IPI00017704.3	Coactosin-like protein		+	-	1	142	15.935	5.66846		SCX Sequest
IPI:IPI00018219.1	Transforming growth factor-beta-induced protein ig-h3		+	+	1	683	74.634	7.7085		SCX Sequest and Mascot
IPI:IPI00018953.1	Dipeptidyl peptidase 4		+	+	1	766	88.2225	6.03662		SCX Sequest
IPI:IPI00022402.3	Protein FAM32A		-	-	1	112	13.1701	9.99365		SCX Sequest
IPI:IPI00030739.1	Apolipoprotein M		+	-	1	188	21.2394	6.01123		SCX Sequest and Mascot
IPI:IPI00031005.3	Protein kinase-like protein SgK196		-	-	1	350	40.024	6.1001		SCX Mascot
IPI:IPI00082138.4	Lipase member J		-	-	1	366	42.3471	6.59521		SCX Sequest
IPI:IPI00180240.2	Thymosin beta-4-like protein 3		-	-	1	44	5.05954	5.05908		SCX Sequest
IPI:IPI00218414.5	Carbonic anhydrase 2		+	+	1	260	29.2279	7.40088		SCX Sequest and Mascot
IPI:IPI00218733.6	Superoxide dismutase [Cu-Zn]		+	+	1	154	15.9259	6.12549		SCX Sequest
IPI:IPI00220216.2	Isoform 6 of Tenascin		-	-	1	1564	171.249	5.09717		SCX Sequest
IPI:IPI00221090.6	Zinc finger homeobox protein 2		-	-	1	1427	152.006	6.3667		SCX Sequest
IPI:IPI00232874.6	DDB1- and CUL4-associated factor 12-like protein 2		-	-	1	463	50.7709	9.23193		SCX Sequest
IPI:IPI00290856.4	Lymphatic vessel endothelial hyaluronic acid receptor 1		+	-	1	322	35.191	8.27979		SCX Sequest
IPI:IPI00299738.1	Procollagen C-endopeptidase enhancer 1		+	+	1	449	47.942	7.43018		SCX Sequest
IPI:IPI00329104.7	Leukocyte immunoglobulin-like receptor subfamily A member 3		-	-	1	439	47.4419	8.08936		SCX Sequest
IPI:IPI00329672.4	Myosin-Ie		-	-	1	1109	126.961	8.92432		SCX Sequest
IPI:IPI00335248.1	ribosomal protein S6 kinase alpha-5 isoform b		-	-	1	549	61.7299	6.90283		SCX Sequest
IPI:IPI00383975.1	Full-length cDNA clone CS0DN001YP04 of Adult brain of Homo sapiens (Fragment)		-	-	1	367	40.4313	5.30029		SCX Sequest
IPI:IPI00384542.4	Isoform 2 of Nidogen-1		-	-	1	1114	121.941	5.46533		SCX Sequest
IPI:IPI00410714.5	Hemoglobin subunit alpha		+	-	1	142	15.2479	8.67529		SCX Sequest and Mascot
IPI:IPI00427822.2	Isoform 3 of A disintegrin and metalloproteinase with thrombospondin motifs 13		-	-	1	1340	144.423	7.09326		SCX Sequest and Mascot
IPI:IPI00439446.3	Mannosidase, alpha, class 1A, member 1, isoform CRA_a		+	-	1	367	40.0118	7.15186		SCX Sequest
IPI:IPI00443799.2	Isoform 1 of Putative sodium-coupled neutral amino acid transporter 10		-	-	1	1119	119.687	5.73193		SCX Sequest
IPI:IPI00445227.1	Isoform 2 of Cell surface glycoprotein MUC18		-	-	1	527	57.5692	5.51611		SCX Sequest and Mascot
IPI:IPI00448904.2	LRP1 protein		-	-	1	439	48.146	4.99561		SCX Sequest
IPI:IPI00470896.4	Isoform 2 of Zinc finger FYVE domain-containing protein 26		-	-	1	2518	282.319	6.40479		SCX Sequest
IPI:IPI00478003.3	Alpha-2-macroglobulin		+	+	1	1474	163.188	6.45557		SCX Sequest
IPI:IPI00514395.2	GDP dissociation inhibitor 2		-	-	1	208	23.7644	9.08545		SCX Sequest and Mascot
IPI:IPI00515092.1	Osteoglycin		+	-	1	268	30.4373	8.33838		SCX Sequest and Mascot
IPI:IPI00607861.2	GDH/6PGL endoplasmic bifunctional protein		-	+	1	791	88.8364	7.29834		SCX Sequest
IPI:IPI00640599.1	Uncharacterized protein	fetuin B	-	-	1	392	43.8862	8.08936		SCX Sequest
IPI:IPI00641229.4	Ig alpha-2 chain C region		-	-	1	340	36.503	6.1001		SCX Mascot
IPI:IPI00641374.2	Ciliary neurotrophic factor receptor		-	-	1	256	28.8136	8.14795		SCX Sequest
IPI:IPI00643090.1	cDNA FLJ55701, highly similar to Vascular cell adhesion protein 1		-	-	1	677	74.299	5.22412		SCX Sequest and Mascot
IPI:IPI00654729.3	Uncharacterized protein	selenoprotein P isoform 1 precursor	-	-	1	476	51.7071	5.52881		SCX Sequest and Mascot
IPI:IPI00657802.1	Uncharacterized protein	Uncharacterized protein	-	-	1	147	16.5365	5.14795		SCX Sequest
IPI:IPI00745154.4	Isoform 2 of Multimerin-1		-	-	1	531	58.133	8.71924		SCX Sequest and Mascot
IPI:IPI00783390.2	Isoform 1 of Neural cell adhesion molecule L1-like protein		-	-	1	1208	134.973	5.75732		SCX Sequest
IPI:IPI00783862.2	Flavin reductase		-	-	1	206	22.1054	7.6499		SCX Sequest and Mascot
IPI:IPI00790621.1	71 kDa protein		-	-	1	646	70.64	6.75635		SCX Sequest
IPI:IPI00795504.1	cDNA FLJ52980, highly similar to CD166 antigen		-	-	1	555	61.8716	6.18896		SCX Sequest
IPI:IPI00795504.2	cDNA FLJ52980, highly similar to CD166 antigen		-	-	1	532	59.4603	6.40479		SCX Mascot
IPI:IPI00798065.1	Isoform B of Coagulation factor VII		-	-	1	444	49.2883	6.94678		SCX Mascot
IPI:IPI00828108.1	Isoform 15 of CD44 antigen		-	-	1	294	32.0544	5.21143		SCX Sequest
IPI:IPI00855875.1	Isoform 4 of Proline-rich acidic protein 1		-	-	1	142	16.3404	5.22412		SCX Sequest
IPI:IPI00869004.1	Isoform 3 of Alpha-1-antitrypsin		-	-	1	306	34.7336	5.18604		SCX Sequest
IPI:IPI00871463.3	19 kDa protein		-	-	1	161	18.689	9.77393		SCX Sequest
IPI:IPI00872077.2	PAPLN protein		-	-	1	808	87.2378	7.34229		SCX Sequest
IPI:IPI00872510.1	Uncharacterized protein	Plexin domain-containing protein 2	-	-	1	408	45.8771	6.50732		SCX Sequest and Mascot
IPI:IPI00879084.2	Uncharacterized protein	Non-POU domain-containing octamer-binding pro...	-	-	1	179	20.8497	7.23975		SCX Sequest
IPI:IPI00879437.1	Protein		-	-	1	279	32.1264	8.51416		SCX Sequest
IPI:IPI00887154.2	Complement component 4B		-	-	1	1744	192.628	7.26904		SCX Mascot
IPI:IPI00893541.1	14 kDa protein		-	-	1	123	13.5108	7.29834		SCX Sequest and Mascot
IPI:IPI00893853.1	Protein		-	-	1	276	30.2752	5.80811		SCX Sequest
IPI:IPI00894373.1	Protein		-	-	1	210	22.6106	6.94678		SCX Mascot
IPI:IPI00908626.1	cDNA FLJ51294, highly similar to JmjC domain-containing histone demethylation protein 1A		-	-	1	420	47.019	9.24658		SCX Sequest
IPI:IPI00908953.1	cDNA FLJ54049, highly similar to Multimerin-2		-	-	1	727	79.9884	5.74463		SCX Sequest and Mascot
IPI:IPI00909424.1	cDNA FLJ57958, highly similar to NADH dehydrogenase (ubiquinone) 1 alpha subcomplex subunit 13		-	-	1	120	14.0763	9.0708		SCX Sequest
IPI:IPI00909711.1	cDNA FLJ53006, highly similar to Vinculin		-	-	1	327	36.2257	6.44287		SCX Sequest
IPI:IPI00909841.1	cDNA FLJ51435, moderately similar to Cofilin-1		-	-	1	112	12.4514	6.59521		SCX Sequest
IPI:IPI00917820.1	Uncharacterized protein	L-lactate dehydrogenase B chain	-	-	1	145	16.2609	6.26514		SCX Sequest
IPI:IPI00921003.2	Isoform 4 of Ninein		-	-	1	2029	235.988	5.021		SCX Sequest
IPI:IPI00922334.1	cDNA FLJ60487, highly similar to Macrophage colony-stimulating factor 1receptor		-	-	1	343	37.4251	6.88818		SCX Mascot
IPI:IPI00922838.1	cDNA FLJ56074, highly similar to 150 kDa oxygen-regulated protein		-	-	1	981	109.637	6.13818		SCX Sequest
IPI:IPI00924616.1	Uncharacterized protein	Cementoblastoma-derived protein 1	-	-	1	104	11.3955	7.1665		SCX Sequest
IPI:IPI00925411.1	13 kDa protein	Peptidyl-prolyl cis-trans isomerase	-	-	1	120	13.0133	6.771		SCX Mascot
IPI:IPI00942210.1	Putative uncharacterized protein DKFZp779P1227		-	-	1	268	29.1893	9.68604		SCX Sequest
IPI:IPI00943343.1	PTPRJ, protein tyrosine phosphatase receptor J, eta		-	-	1	538	57.0978	5.60498		SCX Sequest and Mascot
IPI:IPI00945726.1	Complement C2		-	-	1	160	18.0077	5.26221		SCX Mascot
IPI:IPI00953675.1	inter-alpha-trypsin inhibitor heavy chain H1 isoform b		-	-	1	769	86.1377	6.48096		SCX Sequest
IPI:IPI00956079.3	Major histocompatibility complex class I B (Fragment)		-	-	1	240	26.2751	5.61768		SCX Sequest
IPI:IPI00964097.1	Uncharacterized protein	Keratin, type II cytoskeletal 6C	-	-	1	105	12.2145	8.92432		SCX Sequest
IPI:IPI00964180.1	Protein		-	-	1	185	21.8688	5.77002		SCX Sequest
IPI:IPI00964672.1	Uncharacterized protein	SH3 domain and tetratricopeptide repeats-cont...	-	-	1	348	39.2027	7.73779		SCX Sequest
IPI:IPI00965611.1	cDNA FLJ52396, highly similar to SPARC-like protein 1		-	-	1	539	61.7217	4.84326		SCX Sequest
IPI:IPI00966406.1	96 kDa protein	Thrombospondin-4	-	-	1	870	95.9447	4.62744		SCX Sequest
IPI:IPI00966452.1	Uncharacterized protein	Matrin-3	-	-	1	288	32.686	6.13818		SCX Sequest
IPI:IPI00966849.1	Protein of unknown function DUF1193 family protein		-	-	1	353	40.9114	6.97607		SCX Sequest
IPI:IPI00967092.1	Protein		-	-	1	159	17.978	6.99072		SCX Sequest and Mascot
IPI:IPI00967517.1	Protein		-	-	1	97	11.0894	6.29053		SCX Sequest
IPI:IPI00977554.1	endoribonuclease Dicer isoform 2		-	-	1	1829	208.315	5.73193		SCX Mascot
IPI:IPI00978302.1	Uncharacterized protein	Cofilin-1	-	-	1	79	9.08474	8.38232		SCX Mascot
IPI:IPI00982087.1	cDNA FLJ59408, highly similar to 150 kDa oxygen-regulated protein		-	-	1	656	72.8021	4.89404		SCX Mascot
IPI:IPI00982370.1	CD44 molecule		-	-	1	181	19.5581	4.55127		SCX Mascot
IPI:IPI00001589.1	Mitochondrial import inner membrane translocase subunit Tim13		-	-	1	95	10.493	8.17725			SDS-PAGE Sequest
IPI:IPI00003927.5	Peptidyl-prolyl cis-trans isomerase D		-	-	1	370	40.7379	7.21045			SDS-PAGE Sequest and Mascot
IPI:IPI00003935.6	Histone H2B type 2-E		-	-	1	126	13.9116	10.3159			SDS-PAGE Sequest and Mascot
IPI:IPI00007188.5	ADP/ATP translocase 2		-	-	1	298	32.8742	9.74463			SDS-PAGE Sequest
IPI:IPI00007765.5	Stress-70 protein, mitochondrial		+	-	1	679	73.6348	6.16357			SDS-PAGE Sequest
IPI:IPI00007778.1	Di-N-acetylchitobiase		+	-	1	385	43.7316	6.63916			SDS-PAGE Sequest
IPI:IPI00008986.1	Large neutral amino acids transporter small subunit 1		-	-	1	507	54.9743	7.72314			SDS-PAGE Sequest
IPI:IPI00009276.2	Endothelial protein C receptor precursor		+	-	1	275	30.6958	8.48486			SDS-PAGE Sequest
IPI:IPI00011736.4	Phosphatidylinositol 3-kinase regulatory subunit beta		-	-	1	728	81.4949	6.43018			SDS-PAGE mascot
IPI:IPI00013885.1	Caspase-14		+	-	1	242	27.662	5.57959			SDS-PAGE Sequest
IPI:IPI00014048.1	Ribonuclease pancreatic		+	-	1	156	17.6327	8.79248			SDS-PAGE Sequest
IPI:IPI00019980.1	Rhodopsin kinase		-	-	1	563	63.4851	5.87158			SDS-PAGE mascot
IPI:IPI00021290.5	ATP-citrate synthase		-	-	1	1101	120.762	7.32764			SDS-PAGE mascot
IPI:IPI00022446.1	Platelet factor 4		+	+	1	101	10.8379	8.6167			SDS-PAGE Sequest
IPI:IPI00022774.3	Transitional endoplasmic reticulum ATPase		-	-	1	806	89.2657	5.26221			SDS-PAGE Sequest
IPI:IPI00023711.2	Envoplakin		-	-	1	2033	231.463	6.96143			SDS-PAGE Sequest
IPI:IPI00023728.1	Gamma-glutamyl hydrolase		+	+	1	318	35.9412	7.10791			SDS-PAGE Sequest
IPI:IPI00028517.1	Ras-related protein Rab-33A		-	-	1	237	26.5755	7.88428			SDS-PAGE Sequest
IPI:IPI00029235.1	Insulin-like growth factor-binding protein 6		+	+	1	240	25.3062	7.81104			SDS-PAGE Sequest
IPI:IPI00029699.1	Ribonuclease 4		+	-	1	147	16.8294	9.02686			SDS-PAGE Sequest
IPI:IPI00030871.2	Pantetheinase		+	-	1	513	56.9751	5.5542			SDS-PAGE Sequest and Mascot
IPI:IPI00059366.4	Isoform 3 of Core histone macro-H2A.1		-	-	1	371	39.4644	9.77393			SDS-PAGE mascot
IPI:IPI00064591.1	Isoform 8 of Sorbin and SH3 domain-containing protein 1		-	-	1	811	90.9835	6.27783			SDS-PAGE Sequest
IPI:IPI00104143.1	Isoform 2 of Toll/interleukin-1 receptor domain-containing adapter protein		-	-	1	235	25.3065	6.34131			SDS-PAGE Sequest
IPI:IPI00166205.3	Isoform 2 of Keratin, type II cytoskeletal 78		+	-	1	410	44.9895	5.19873			SDS-PAGE Sequest
IPI:IPI00166955.3	57 kDa protein		-	-	1	532	57.3882	5.47803			SDS-PAGE Sequest
IPI:IPI00218795.1	selectin L precursor		+	-	1	385	43.5886	7.15186			SDS-PAGE Sequest
IPI:IPI00218999.3	Uncharacterized protein	complement component 1, s subcomponent	-	-	1	439	49.8724	6.82959			SDS-PAGE Sequest
IPI:IPI00219729.3	Mitochondrial 2-oxoglutarate/malate carrier protein		-	-	1	314	34.0399	9.90576			SDS-PAGE Sequest and Mascot
IPI:IPI00244111.10	Isoform 3 of Type II inositol-1,4,5-trisphosphate 5-phosphatase		-	-	1	749	85.5656	5.74463			SDS-PAGE Sequest
IPI:IPI00299078.1	Salivary acidic proline-rich phosphoprotein 1/2		-	-	1	166	17.0063	4.84326			SDS-PAGE Sequest and Mascot
IPI:IPI00299547.4	Isoform 1 of Neutrophil gelatinase-associated lipocalin		+	-	1	198	22.5737	8.90967			SDS-PAGE Sequest
IPI:IPI00305457.5	PRO2275		-	-	1	120	13.0889	8.96826			SDS-PAGE Sequest
IPI:IPI00329306.3	Keratin, type II cytoskeletal 74		-	-	1	529	57.8296	7.7085			SDS-PAGE mascot
IPI:IPI00375559.3	Isoform 1 of Otoferlin		-	-	1	1997	226.61	5.69385			SDS-PAGE mascot
IPI:IPI00382804.1	EEF1A protein (Fragment)		-	-	1	227	24.1809	9.5835			SDS-PAGE Sequest
IPI:IPI00385250.2	Protease, serine, 3		-	-	1	178	19.3888	6.07471			SDS-PAGE mascot
IPI:IPI00385252.1	Ig kappa chain V-III region GOL		-	-	1	109	11.823	9.24658			SDS-PAGE Sequest
IPI:IPI00386010.1	5C5	SLC25A10	-	-	1	178	19.5323	9.5249			SDS-PAGE Sequest
IPI:IPI00396004.3	cDNA FLJ46111 fis, clone TESTI2034913, moderately similar to Keratin, type II cytoskeletal 8		-	-	1	197	22.3291	4.84326			SDS-PAGE Sequest
IPI:IPI00398798.2	histone H2A.V isoform 3		-	-	1	102	10.9921	10.228			SDS-PAGE Sequest and Mascot
IPI:IPI00400835.6	Uncharacterized protein	peroxiredoxin 2	-	-	1	520	58.9314	6.25244			SDS-PAGE Sequest
IPI:IPI00413691.2	polypyrimidine tract-binding protein 1 isoform d		-	-	1	197	21.8995	9.5542			SDS-PAGE Sequest
IPI:IPI00418705.1	cDNA FLJ46332 fis, clone TESTI4045470		-	-	1	148	15.503	12.2202			SDS-PAGE mascot
IPI:IPI00444138.3	cDNA FLJ46074 fis, clone TESTI2001915, highly similar to Homo sapiens actin filament associated protein		-	-	1	413	45.0102	9.48096			SDS-PAGE Sequest
IPI:IPI00470803.2	Uncharacterized protein	complement component 4 binding protein, alpha	-	-	1	203	22.7874	5.59229			SDS-PAGE mascot
IPI:IPI00477355.3	KIF1-binding protein		-	-	1	621	71.7684	5.49072			SDS-PAGE Sequest
IPI:IPI00478209.6	Isoform 1 of Ras-related protein Rab-19		-	-	1	284	31.7841	8.00146			SDS-PAGE Sequest
IPI:IPI00513814.1	Chaperonin containing TCP1, subunit 3		-	-	1	188	20.9365	5.43994			SDS-PAGE Sequest
IPI:IPI00550987.2	Isoform 1 of Centrosomal protein of 135 kDa		-	-	1	1140	133.408	6.21436			SDS-PAGE mascot
IPI:IPI00552590.1	T-complex protein 1 subunit zeta isoform b		-	-	1	486	53.2551	7.26904			SDS-PAGE Sequest and Mascot
IPI:IPI00552768.1	Thioredoxin, isoform CRA_b		-	-	1	85	9.44569	6.03662			SDS-PAGE Sequest and Mascot
IPI:IPI00640611.1	9 kDa protein		-	-	1	81	9.15759	6.771			SDS-PAGE Sequest
IPI:IPI00642045.1	14 kDa protein		-	-	1	122	13.696	5.21143			SDS-PAGE mascot
IPI:IPI00643525.1	Uncharacterized protein	S100 calcium binding protein A9	-	-	1	1744	192.621	7.07861			SDS-PAGE mascot
IPI:IPI00645966.1	Uncharacterized protein	inter-alpha (globulin) inhibitor H3	-	-	1	207	23.6583	9.80322			SDS-PAGE Sequest
IPI:IPI00646265.1	Amylase, alpha 1B		-	-	1	226	25.5544	7.31299			SDS-PAGE Sequest and Mascot
IPI:IPI00646774.1	51 kDa protein		-	-	1	528	51.4443	8.35303			SDS-PAGE Sequest
IPI:IPI00657702.1	cDNA FLJ30017 fis, clone 3NB692000484, highly similar to Ubiquitin carboxyl-terminal hydrolase isozymeL1		-	-	1	142	15.6806	5.35107			SDS-PAGE Sequest
IPI:IPI00658013.1	nucleophosmin isoform 3		-	-	1	259	28.3827	4.71631			SDS-PAGE Sequest and Mascot
IPI:IPI00759680.3	Isoform 3 of Bromodomain-containing protein 9		-	-	1	481	53.2154	5.32568			SDS-PAGE Sequest
IPI:IPI00783250.1	TRIP12 protein		-	-	1	1722	191.954	6.49365			SDS-PAGE Sequest
IPI:IPI00784332.4	Tubulin alpha-3C/D chain		-	-	1	326	35.9029	6.11279			SDS-PAGE Sequest
IPI:IPI00786995.1	similar to protein kinase, DNA-activated, catalytic polypeptide		-	-	1	4096	465.166	7.2251			SDS-PAGE Sequest
IPI:IPI00787845.2	Wilms tumor protein 1-interacting protein		-	-	1	654	67.4115	8.92432			SDS-PAGE mascot
IPI:IPI00788781.1	Uncharacterized protein	Chromodomain-helicase-DNA-binding protein 1-l...	-	-	1	101	11.2495	6.07471			SDS-PAGE Sequest
IPI:IPI00789134.5	Glyceraldehyde-3-phosphate dehydrogenase		-	-	1	260	27.8531	6.94678			SDS-PAGE Mascot
IPI:IPI00789295.1	11 kDa protein		-	-	1	102	11.1543	4.88135			SDS-PAGE Sequest
IPI:IPI00790304.1	Uncharacterized protein	Golgi-associated plant pathogenesis-related p...	-	-	1	184	20.3612	7.32764			SDS-PAGE Sequest
IPI:IPI00792130.1	Conserved hypothetical protein		-	-	1	73	8.02719	9.26123			SDS-PAGE Sequest
IPI:IPI00793352.2	27 kDa protein		-	-	1	231	26.9264	8.41162			SDS-PAGE Sequest
IPI:IPI00793641.1	cDNA FLJ50908, highly similar to Homo sapiens keratin protein K6irs (K6IRS2), mRNA		-	-	1	398	44.7287	5.19873			SDS-PAGE Sequest
IPI:IPI00795527.1	21 kDa protein		-	-	1	185	20.8002	7.40088			SDS-PAGE Sequest
IPI:IPI00796137.1	38 kDa protein	Keratin, type II cytoskeletal 71	-	-	1	336	37.8475	5.47803			SDS-PAGE Sequest
IPI:IPI00815805.1	Isoform 3 of Probable tRNA (uracil-O(2)-)-methyltransferase		-	-	1	365	41.3007	8.63135			SDS-PAGE Sequest
IPI:IPI00816182.1	PNAS-140 (Fragment)		-	-	1	153	17.1185	4.79248			SDS-PAGE mascot
IPI:IPI00816520.1	MYH6 protein (Fragment)		-	-	1	84	10.0713	6.56592			SDS-PAGE Sequest
IPI:IPI00843764.2	Isoform C of Trypsin-3		-	-	1	247	26.7102	6.1001			SDS-PAGE Sequest
IPI:IPI00844400.1	23 kDa protein		-	-	1	221	23.4339	9.17334			SDS-PAGE mascot
IPI:IPI00872788.1	Dihydropyrimidinase-related protein 3		-	-	1	570	61.9241	6.49365			SDS-PAGE Sequest
IPI:IPI00878850.1	6 kDa protein		-	-	1	57	6.47636	8.70459			SDS-PAGE Sequest
IPI:IPI00888126.2	similar to pyruvate kinase, muscle		-	-	1	281	30.7009	6.94678			SDS-PAGE Sequest
IPI:IPI00888160.2	similar to phosphodiesterase 4D interacting protein		-	-	1	259	28.1067	9.12939			SDS-PAGE Sequest
IPI:IPI00890750.2	Isoform 2 of Fibrous sheath-interacting protein 2		-	-	1	3466	391.458	7.81104			SDS-PAGE Sequest
IPI:IPI00892519.1	23 kDa protein		-	-	1	216	23.3739	9.46631			SDS-PAGE mascot
IPI:IPI00893243.1	22 kDa protein	Tankyrase-1	-	-	1	190	21.9012	7.26904			SDS-PAGE Sequest
IPI:IPI00893580.1	HLA-B associated transcript 1		-	-	1	328	38.2107	7.1958			SDS-PAGE Sequest
IPI:IPI00893703.1	Uncharacterized protein		-	-	1	187	21.2988	10.272			SDS-PAGE Sequest and Mascot
IPI:IPI00893760.1	Protein		-	-	1	161	18.0205	8.00146			SDS-PAGE mascot
IPI:IPI00894030.2	258 kDa protein		-	-	1	2368	257.85	8.54346			SDS-PAGE mascot
IPI:IPI00908787.1	cDNA FLJ57403, moderately similar to Creatine kinase M-type		-	-	1	126	14.1151	4.85596			SDS-PAGE Sequest
IPI:IPI00909207.1	cDNA FLJ60461, highly similar to Peroxiredoxin-2		-	-	1	183	20.0946	8.77783			SDS-PAGE mascot
IPI:IPI00909466.2	cDNA FLJ55127, highly similar to Heterogeneous nuclear ribonucleoprotein L		-	-	1	241	25.8448	6.31592			SDS-PAGE Sequest and Mascot
IPI:IPI00909509.1	cDNA FLJ59138, highly similar to Annexin A2		-	-	1	194	21.6561	6.354			SDS-PAGE Sequest
IPI:IPI00909555.1	cDNA FLJ51602, highly similar to Interferon-induced guanylate-binding protein 1		-	-	1	357	41.2442	6.72705			SDS-PAGE mascot
IPI:IPI00910267.1	Aspartate aminotransferase		-	-	1	387	42.96	9.29053			SDS-PAGE Sequest and Mascot
IPI:IPI00910923.1	cDNA FLJ60404, highly similar to Mitogen-activated protein kinase 7 (Fragment)		-	-	1	882	95.9664	7.86963			SDS-PAGE Sequest
IPI:IPI00910974.1	Phosphoglycerate kinase		-	-	1	161	17.0388	5.60498			SDS-PAGE Sequest and Mascot
IPI:IPI00916391.1	Uncharacterized protein	Prolyl 4-hydroxylase subunit alpha-2	-	-	1	156	17.6598	5.49072			SDS-PAGE Sequest
IPI:IPI00920976.1	Transposase, L1 family protein		-	-	1	113	13.1592	9.74463			SDS-PAGE Sequest
IPI:IPI00921283.1	2-oxoglutarate dehydrogenase-like, mitochondrial isoform c		-	-	1	801	91.1738	6.82959			SDS-PAGE Sequest
IPI:IPI00922193.1	cDNA FLJ59705, highly similar to Transcription factor 7-like 2		-	-	1	339	37.9743	9.30518			SDS-PAGE Sequest
IPI:IPI00924593.1	cDNA FLJ52880, highly similar to Malate dehydrogenase, mitochondrial		-	-	1	296	30.8552	8.42627			SDS-PAGE Sequest
IPI:IPI00926190.1	Uncharacterized protein		-	-	1	220	23.6172	9.14404			SDS-PAGE Sequest
IPI:IPI00926948.1	Uncharacterized protein	Actin, gamma-enteric smooth muscle	-	-	1	78	8.67958	10.1987			SDS-PAGE Sequest
IPI:IPI00929247.1	Conserved hypothetical protein		-	-	1	91	10.2333	8.07471			SDS-PAGE Sequest
IPI:IPI00930562.1	Activated RNA polymerase II transcription cofactor 4 (Fragment)		-	-	1	73	8.64939	8.44092			SDS-PAGE Sequest
IPI:IPI00939422.1	ATP-citrate synthase isoform 2		-	-	1	1091	119.695	7.32764			SDS-PAGE Sequest
IPI:IPI00939596.1	18 kDa protein		-	-	1	158	17.9841	8.90967			SDS-PAGE Sequest
IPI:IPI00940746.1	hypothetical protein LOC342346		-	-	1	1141	124.963	7.03467			SDS-PAGE Sequest
IPI:IPI00942117.1	Cysteine-rich secretory protein 3		-	-	1	245	27.612	7.79639			SDS-PAGE Sequest
IPI:IPI00942831.1	cDNA FLJ50711, moderately similar to Ras-related protein Rap-1b		-	-	1	142	16.0233	8.85107			SDS-PAGE Sequest
IPI:IPI00946206.1	63 kDa protein	butyrylcholine esterase CRA-b	-	-	1	562	63.4231	7.84033			SDS-PAGE mascot
IPI:IPI00953390.1	Coagulation factor V (Fragment)		-	-	1	72	8.53427	8.99756			SDS-PAGE mascot
IPI:IPI00963858.1	Heterogeneous nuclear ribonucleoprotein U		-	-	1	242	27.3873	5.43994			SDS-PAGE Sequest
IPI:IPI00964493.1	cDNA FLJ51747, highly similar to Succinyl-CoA:3-ketoacid-coenzyme A transferase1, mitochondrial		-	-	1	334	36.6669	6.7417			SDS-PAGE Sequest
IPI:IPI00964794.1	Uncharacterized protein	Leucine-rich repeat-containing G-protein coup...	-	-	1	260	29.2659	5.2876			SDS-PAGE Sequest and Mascot
IPI:IPI00966417.1	Uncharacterized protein	Netrin receptor UNC5C	-	-	1	121	13.7763	9.30518			SDS-PAGE mascot
IPI:IPI00966681.1	Uncharacterized protein	Transforming growth factor-beta-induced prote...	-	-	1	99	11.0102	5.17334			SDS-PAGE Sequest
IPI:IPI00967298.1	Uncharacterized protein	Cyclic nucleotide gated channel alpha 1, isof...	-	-	1	86	9.6405	4.52588			SDS-PAGE Sequest
IPI:IPI00967837.1	111 kDa protein	MMRN1	-	-	1	970	110.683	7.02002			SDS-PAGE Sequest
IPI:IPI00980065.1	Protein		-	-	1	198	23.7446	4.76709			SDS-PAGE mascot
IPI:IPI00984879.1	ACTA2 protein (Fragment)		-	-	1	330	36.7832	5.35107			SDS-PAGE mascot
IPI:IPI00985187.1	14 kDa protein		-	-	1	128	14.3352	5.99854			SDS-PAGE mascot
